# Supplementary material
Source: PubMed Central journal article supplement (PMC2785227)
Supplement: NIHMS153742-supplement-Supp1.pdf [file NIHMS153742-supplement-Supp1.pdf]

**Supplementary Table 1. Details of Prospective Cohorts included in the Present Analyses**

| <b>Study</b>                                    | <b>Study description</b>                                   | <b>Year of inception</b> | <b>Participants</b>                                                                                | <b>Number with blood samples</b> | <b>Years of Blood Collection</b> | <b>Follow-up Years</b> |
|-------------------------------------------------|------------------------------------------------------------|--------------------------|----------------------------------------------------------------------------------------------------|----------------------------------|----------------------------------|------------------------|
| Physicians' Health Study I (PHS I)              | Randomized clinical trial of aspirin and beta-carotene     | 1982                     | 22,071 male physicians, aged 40-84 in 1982, free of prior CVD or cancer.                           | 15,124<br>1,218                  | 1982-1984<br>1996-1998           | 20.8<br>8.3            |
| Physicians' Health Study II (PHS II)            | Randomized clinical trial of antioxidants and multivitamin | 1997                     | 14,641 male physicians, aged $\geq 50$ years, including 7,641 PHS I and 7,000 new participants.    | 11,133 <sup>†</sup>              | 1995-2002                        | 8.4                    |
| Nurses' Health Study (NHS)                      | Prospective cohort study                                   | 1976                     | 121,700 female registered nurses, aged 30-55 in 1976                                               | 32,826                           | 1989-1990                        | 16.4                   |
| Health Professionals Follow-up Study (HPFS)     | Prospective cohort study                                   | 1986                     | 51,529 male health professionals, aged 40-75 in 1986                                               | 18,018                           | 1993-1994                        | 10.5                   |
| Women's Health Study (WHS)                      | Randomized clinical trial of aspirin and vitamin E         | 1992                     | 39,876 female health professionals, aged 40 or older in 1992, free of prior CVD or cancer          | 28,345                           | 1993-1996                        | 10.6                   |
| Women's Antioxidant Cardiovascular Study (WACS) | Randomized clinical trial of antioxidants and B-vitamins   | 1996                     | 8,171 female health professional aged 40 or older with CVD or at least three coronary risk factors | 5,922                            | 1993-1996                        | 9.0                    |

<sup>†</sup> Of these, 6,518 blood samples are from men who have not previously donated a blood sample in PHS I

**Supplemental Table 2: Relationship between coronary heart disease risk factors at baseline and rs10757274 genotypes in controls**

|                                            | rs10757274   |              |              | P-Value |
|--------------------------------------------|--------------|--------------|--------------|---------|
|                                            | GG           | AG           | AA           |         |
| Age (years +/-sd)                          | 64.6 (9.3)   | 63.6 (9.4)   | 64.7 (8.9)   | 0.86    |
| Sex (Women/Men) n,%                        | 114 (32.5 %) | 278 (37.1 %) | 133 (37.1 %) | 0.21    |
| History of CVD n,%                         | 101 (28.8 %) | 177 (23.6 %) | 85 (23.7%)   | 0.12    |
| Hypertension n,%                           | 138 (39.3 %) | 290 (38.8 %) | 136 (38.1 %) | 0.74    |
| Hypercholesterolemia n,%                   | 147 (42.9 %) | 306 (41.9 %) | 129 (36.5 %) | 0.09    |
| Parental History of MI n,%                 | 59 (16.8 %)  | 113 (15.1 %) | 42 (11.7 %)  | 0.05    |
| Diabetes n,%                               | 18 (5.21%)   | 49 (6.5 %)   | 34 (9.5 %)   | 0.02    |
| Body Mass Index: (kg/m <sup>2</sup> ) (SD) | 25.7 (4.5)   | 25.7 (3.8)   | 26.0 (4.4)   | 0.34    |

**Supplementary Table 3. Association of sudden cardiac death with correlated 9p21 variant rs2383207.** Shown are the odds ratios (95% CI) for increasing copy of the G allele of rs2383207 from conditional logistic regression models under an additive model.

| Cohort        | Case/<br>control | rs2383207 |                       |                          |         |
|---------------|------------------|-----------|-----------------------|--------------------------|---------|
|               |                  | n         | Frequency of G Allele | OR per G Allele (95% CI) | P-value |
| HPFS          | case             | 110       | 0.614                 | 1.58<br>(1.15-2.14)      | 0.005   |
| HPFS          | control          | 331       | 0.546                 |                          |         |
| PHS I         | case             | 131       | 0.565                 | 1.08<br>(0.81 - 1.44)    | 0.60    |
| PHS I         | control          | 387       | 0.541                 |                          |         |
| PHS II        | case             | 75        | 0.540                 | 1.02<br>(0.70- 1.50)     | 0.92    |
| PHS II        | control          | 218       | 0.534                 |                          |         |
| NHS           | case             | 107       | 0.575                 | 1.25<br>(0.90- 1.74)     | 0.17    |
| NHS           | control          | 321       | 0.527                 |                          |         |
| WACS          | case             | 35        | 0.529                 | 1.19<br>(0.70- 2.02)     | 0.53    |
| WACS          | control          | 105       | 0.481                 |                          |         |
| WHS           | case             | 38        | 0.513                 | 1.42<br>(0.83 - 2.43)    | 0.20    |
| WHS           | control          | 107       | 0.439                 |                          |         |
| Meta-analysis | case             | 496       | 0.568                 | 1.23<br>(1.06 - 1.43)    | 0.005   |
| Meta-analysis | control          | 1469      | 0.521                 |                          |         |
